# Supplementary material for: Disseminated diffuse midline gliomas, H3K27-altered mimicking diffuse leptomeningeal glioneuronal tumors: a diagnostical challenge!
Source: PubMed Central journal article supplement (PMC9392342; doi:10.1186/s40478-022-01419-3), 2022-08-19

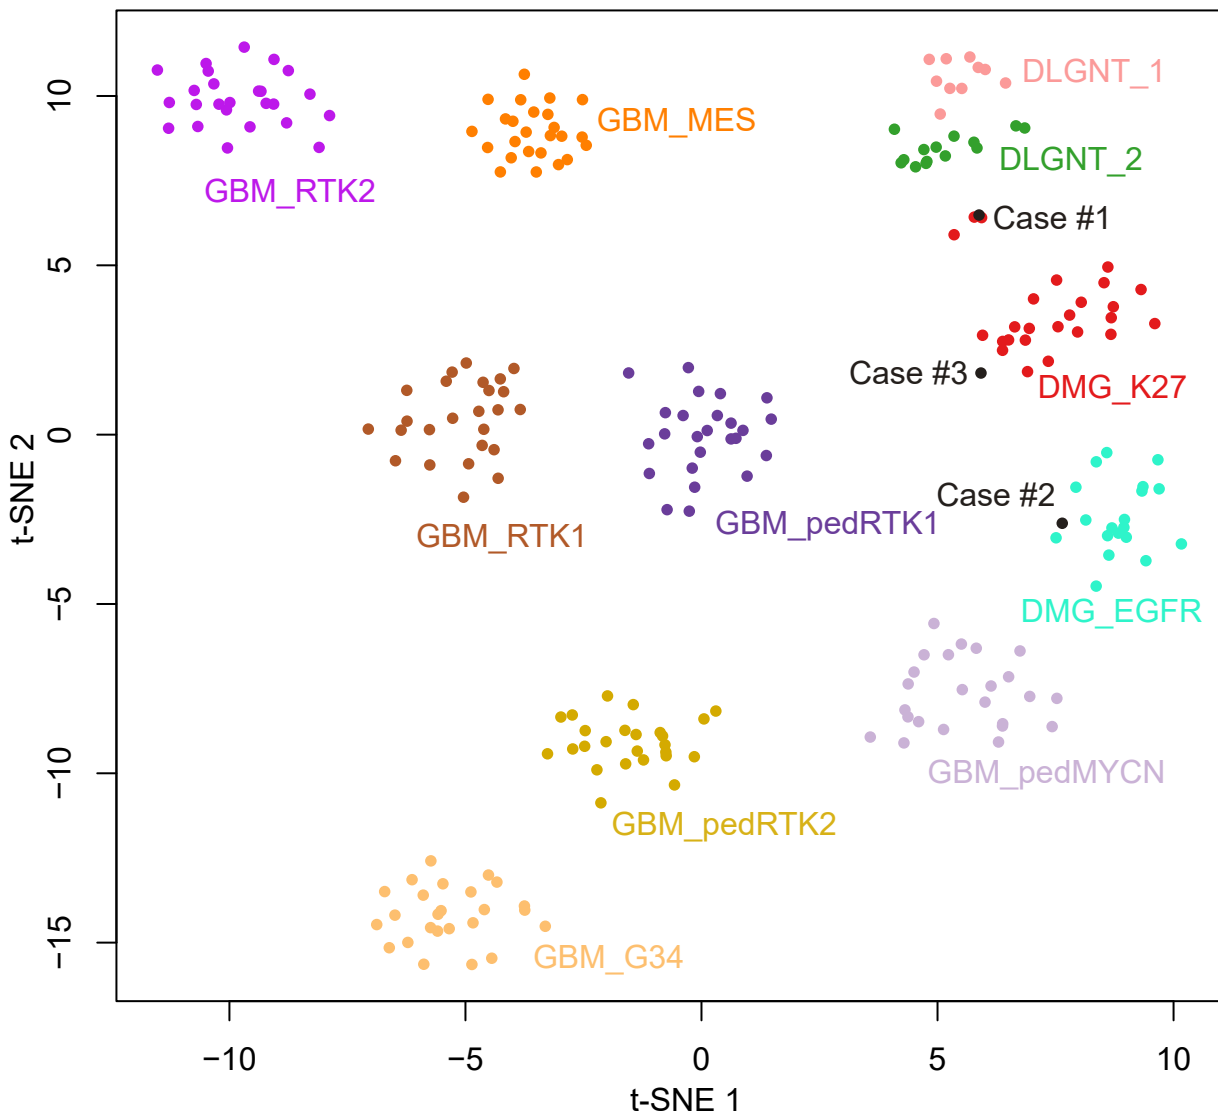

Supplement: 40478_2022_1419_MOESM3_ESM.pdf [file 40478_2022_1419_MOESM3_ESM.pdf]
